# Supplementary material for: Kinetic modeling predicts a stimulatory role for ribosome collisions at elongation stall sites in bacteria
Source: eLife journal article supplement (doi:10.7554/elife.23629), 2017-05-12
Supplement: supp [file elife-23629-supp-v1.zip]

Archive with 10 entries (10 files):
- elife_poa_e23629_Supplementary_File_3.pdf
- elife_poa_e23629_Supplementary_File_2.pdf
- elife_poa_e23629_Figure_6_Figure_Supplement_1.pdf
- elife_poa_e23629_Figure_4_Figure_Supplement_1.pdf
- elife_poa_e23629_Supplementary_File_4.pdf
- elife_poa_e23629_Supplementary_File_1.pdf
- elife_poa_e23629_Figure_5_Figure_Supplement_1.pdf
- elife_poa_e23629_Supplementary_File_7.pdf
- elife_poa_e23629_Supplementary_File_6.pdf
- elife_poa_e23629_Supplementary_File_5.pdf
