# Supplementary material for: Kinetic modeling predicts a stimulatory role for ribosome collisions at elongation stall sites in bacteria
Source: eLife journal article supplement (doi:10.7554/elife.23629), 2017-05-12
Supplement: supp [file elife-23629-supp-v1.zip › elife_poa_e23629_Supplementary_File_1.pdf]

Simulation parameters for Fig. 3

| Parameter                                                    | Value                                                           | Note                                           |
|--------------------------------------------------------------|-----------------------------------------------------------------|------------------------------------------------|
| Stall site identity                                          | CTA                                                             | Panel A, B, C                                  |
| Stall site location (codon number along <i>yfp</i> )         | 46                                                              | Panel A                                        |
| Initiation rate                                              | [0.019, 0.038, 0.075, 0.15, 0.3, 0.6, 1.2, 2.4] s <sup>-1</sup> | Panel A                                        |
| Stall site locations (codon number along <i>yfp</i> )        | 15, 46, 68, 141, 201                                            | Panel B, stall sites were added from 5' to 3'. |
| First stall site location (codon number along <i>yfp</i> )   | 60                                                              | Panel C                                        |
| Second stall site locations (codon number along <i>yfp</i> ) | 63, 64, ... 238                                                 | Panel C                                        |
| tRNA accommodation rate at stall site (TJ model)             | 0.0667s <sup>-1</sup>                                           | Panels A, B, C                                 |
| tRNA accommodation rate at stall site (SAT model)            | 0.287s <sup>-1</sup>                                            | Panels A, B, C                                 |
| tRNA accommodation rate at stall site (CSAT model)           | 0.0875s <sup>-1</sup>                                           | Panels A, B, C                                 |

All other parameters have values shown in Supplementary File 6.
