# Supplementary material for: Kinetic modeling predicts a stimulatory role for ribosome collisions at elongation stall sites in bacteria
Source: eLife journal article supplement (doi:10.7554/elife.23629), 2017-05-12
Supplement: supp [file elife-23629-supp-v1.zip › elife_poa_e23629_Supplementary_File_2.pdf]

Simulation parameters for Fig. 4 (including Figure supplement)

| Parameter                                             | Value                                                    | Note                                                             |
|-------------------------------------------------------|----------------------------------------------------------|------------------------------------------------------------------|
| Stall site identity                                   | CTA, CTC, CTT, TCG                                       |                                                                  |
| Stall site locations (codon number along <i>yfp</i> ) | 46 (6), 68 (10), 141 (14), 201 (18), 147 (5 for Ser TCG) | Different sites were chosen as indicated in title and schematic. |
| tRNA accommodation rate at CTA68 (TJ model)           | $0.07s^{-1}$                                             | Fit from experiment                                              |
| tRNA accommodation rate at CTA141 (TJ model)          | $0.12s^{-1}$                                             | Fit from experiment                                              |
| tRNA accommodation rate at CTA201 (TJ model)          | $0.107s^{-1}$                                            | Fit from experiment                                              |
| tRNA accommodation rate at CTA46 (TJ model)           | $0.091s^{-1}$                                            | Fit from experiment                                              |
| tRNA accommodation rate at CTC68 (TJ model)           | $0.184s^{-1}$                                            | Fit from experiment                                              |
| tRNA accommodation rate at CTC141 (TJ model)          | $0.211s^{-1}$                                            | Fit from experiment                                              |
| tRNA accommodation rate at CTT68 (TJ model)           | $0.0949s^{-1}$                                           | Fit from experiment                                              |
| tRNA accommodation rate at CTT46 (TJ model)           | $0.133s^{-1}$                                            | Fit from experiment                                              |
| tRNA accommodation rate at CTA68 (CSAT model)         | $0.0896s^{-1}$                                           | Fit from experiment                                              |
| tRNA accommodation rate at CTA141 (CSAT model)        | $0.173s^{-1}$                                            | Fit from experiment                                              |
| tRNA accommodation rate at CTA201 (CSAT model)        | $0.154s^{-1}$                                            | Fit from experiment                                              |
| tRNA accommodation rate at CTA46 (CSAT model)         | $0.129s^{-1}$                                            | Fit from experiment                                              |
| tRNA accommodation rate at CTC68 (CSAT model)         | $0.344s^{-1}$                                            | Fit from experiment                                              |
| tRNA accommodation rate at CTC141 (CSAT model)        | $0.444s^{-1}$                                            | Fit from experiment                                              |
| tRNA accommodation rate at CTT68 (CSAT model)         | $0.135s^{-1}$                                            | Fit from experiment                                              |
| tRNA accommodation rate at CTT46 (CSAT model)         | $0.205s^{-1}$                                            | Fit from experiment                                              |
| tRNA accommodation rate at CTA68 (SAT model)          | $0.292s^{-1}$                                            | Fit from experiment                                              |
| tRNA accommodation rate at CTA141 (SAT model)         | $0.637s^{-1}$                                            | Fit from experiment                                              |
| tRNA accommodation rate at CTA201 (SAT model)         | $0.55s^{-1}$                                             | Fit from experiment                                              |
| tRNA accommodation rate at CTA46 (SAT model)          | $0.444s^{-1}$                                            | Fit from experiment                                              |
| tRNA accommodation rate at CTC68 (SAT model)          | $1.45s^{-1}$                                             | Fit from experiment                                              |
| Continued on next page                                |                                                          |                                                                  |

| Continued from previous page                   |                      |                     |
|------------------------------------------------|----------------------|---------------------|
| Parameter                                      | Value                | Note                |
| tRNA accommodation rate at CTC141 (SAT model)  | $1.83\text{s}^{-1}$  | Fit from experiment |
| tRNA accommodation rate at CTT68 (SAT model)   | $0.469\text{s}^{-1}$ | Fit from experiment |
| tRNA accommodation rate at CTT46 (SAT model)   | $0.713\text{s}^{-1}$ | Fit from experiment |
| tRNA accommodation rate at TCG147 (TJ model)   | $0.273\text{s}^{-1}$ | Fit from experiment |
| tRNA accommodation rate at TCG147 (CSAT model) | $0.767\text{s}^{-1}$ | Fit from experiment |
| tRNA accommodation rate at TCG147 (SAT model)  | $4.59\text{s}^{-1}$  | Fit from experiment |
| Initiation rate of variant 1                   | $0.101\text{s}^{-1}$ | Fit from experiment |
| Initiation rate of variant 2                   | $0.143\text{s}^{-1}$ | Fit from experiment |
| Initiation rate of variant 3                   | $0.219\text{s}^{-1}$ | Fit from experiment |
| Initiation rate of variant 4                   | $0.3\text{s}^{-1}$   | Default value       |
| Initiation rate of variant 5                   | $0.334\text{s}^{-1}$ | Fit from experiment |

All other parameters have values shown in Supplementary File 6.
