# Supplementary material for: Kinetic modeling predicts a stimulatory role for ribosome collisions at elongation stall sites in bacteria
Source: eLife journal article supplement (doi:10.7554/elife.23629), 2017-05-12
Supplement: supp [file elife-23629-supp-v1.zip › elife_poa_e23629_Supplementary_File_3.pdf]

Simulation parameters for Fig. 5 (including Figure supplement)

| Parameter                                             | Value                                       | Note                                                                         |
|-------------------------------------------------------|---------------------------------------------|------------------------------------------------------------------------------|
| Stall site identity                                   | CTA, CTC, CTT, TCG                          |                                                                              |
| Stall site locations (codon number along <i>yfp</i> ) | 15 (2), 46 (6), 68 (10), 141 (14), 201 (18) | Different combinations of these sites were chosen as indicated along X-axis. |
| tRNA accommodation rate at CTA68 (TJ model)           | $0.0617\text{s}^{-1}$                       | Fit from experiment                                                          |
| tRNA accommodation rate at CTA141 (TJ model)          | $0.1\text{s}^{-1}$                          | Fit from experiment                                                          |
| tRNA accommodation rate at CTA201 (TJ model)          | $0.0876\text{s}^{-1}$                       | Fit from experiment                                                          |
| tRNA accommodation rate at CTA15 (TJ model)           | $0.0567\text{s}^{-1}$                       | Fit from experiment                                                          |
| tRNA accommodation rate at CTA46 (TJ model)           | $0.0837\text{s}^{-1}$                       | Fit from experiment                                                          |
| tRNA accommodation rate at CTC68 (TJ model)           | $0.267\text{s}^{-1}$                        | Fit from experiment                                                          |
| tRNA accommodation rate at CTC141 (TJ model)          | $0.286\text{s}^{-1}$                        | Fit from experiment                                                          |
| tRNA accommodation rate at CTC201 (TJ model)          | $0.284\text{s}^{-1}$                        | Fit from experiment                                                          |
| tRNA accommodation rate at CTC15 (TJ model)           | $0.137\text{s}^{-1}$                        | Fit from experiment                                                          |
| tRNA accommodation rate at CTC46 (TJ model)           | $0.205\text{s}^{-1}$                        | Fit from experiment                                                          |
| tRNA accommodation rate at CTT68 (TJ model)           | $0.139\text{s}^{-1}$                        | Fit from experiment                                                          |
| tRNA accommodation rate at CTT141 (TJ model)          | $0.27\text{s}^{-1}$                         | Fit from experiment                                                          |
| tRNA accommodation rate at CTT201 (TJ model)          | $0.246\text{s}^{-1}$                        | Fit from experiment                                                          |
| tRNA accommodation rate at CTT15 (TJ model)           | $0.125\text{s}^{-1}$                        | Fit from experiment                                                          |
| tRNA accommodation rate at CTT46 (TJ model)           | $0.172\text{s}^{-1}$                        | Fit from experiment                                                          |
| tRNA accommodation rate at CTA68 (SAT model)          | $0.26\text{s}^{-1}$                         | Fit from experiment                                                          |
| tRNA accommodation rate at CTA141 (SAT model)         | $0.513\text{s}^{-1}$                        | Fit from experiment                                                          |
| tRNA accommodation rate at CTA201 (SAT model)         | $0.404\text{s}^{-1}$                        | Fit from experiment                                                          |
| tRNA accommodation rate at CTA15 (SAT model)          | $0.266\text{s}^{-1}$                        | Fit from experiment                                                          |
| tRNA accommodation rate at CTA46 (SAT model)          | $0.376\text{s}^{-1}$                        | Fit from experiment                                                          |
| tRNA accommodation rate at CTC68 (SAT model)          | $3.06\text{s}^{-1}$                         | Fit from experiment                                                          |
| Continued on next page                                |                                             |                                                                              |

| Continued from previous page |                     |  |  |                       |                     |
|------------------------------|---------------------|--|--|-----------------------|---------------------|
| Parameter                    |                     |  |  | Value                 | Note                |
| tRNA accommodation rate at   | CTC141 (SAT model)  |  |  | $4.4\text{s}^{-1}$    | Fit from experiment |
| tRNA accommodation rate at   | CTC201 (SAT model)  |  |  | $4.6\text{s}^{-1}$    | Fit from experiment |
| tRNA accommodation rate at   | CTC15 (SAT model)   |  |  | $0.764\text{s}^{-1}$  | Fit from experiment |
| tRNA accommodation rate at   | CTC46 (SAT model)   |  |  | $1.59\text{s}^{-1}$   | Fit from experiment |
| tRNA accommodation rate at   | CTT68 (SAT model)   |  |  | $0.777\text{s}^{-1}$  | Fit from experiment |
| tRNA accommodation rate at   | CTT141 (SAT model)  |  |  | $3.94\text{s}^{-1}$   | Fit from experiment |
| tRNA accommodation rate at   | CTT201 (SAT model)  |  |  | $2.85\text{s}^{-1}$   | Fit from experiment |
| tRNA accommodation rate at   | CTT15 (SAT model)   |  |  | $0.649\text{s}^{-1}$  | Fit from experiment |
| tRNA accommodation rate at   | CTT46 (SAT model)   |  |  | $1.09\text{s}^{-1}$   | Fit from experiment |
| tRNA accommodation rate at   | CTA68 (CSAT model)  |  |  | $0.0769\text{s}^{-1}$ | Fit from experiment |
| tRNA accommodation rate at   | CTA141 (CSAT model) |  |  | $0.147\text{s}^{-1}$  | Fit from experiment |
| tRNA accommodation rate at   | CTA201 (CSAT model) |  |  | $0.123\text{s}^{-1}$  | Fit from experiment |
| tRNA accommodation rate at   | CTA15 (CSAT model)  |  |  | $0.0726\text{s}^{-1}$ | Fit from experiment |
| tRNA accommodation rate at   | CTA46 (CSAT model)  |  |  | $0.113\text{s}^{-1}$  | Fit from experiment |
| tRNA accommodation rate at   | CTC68 (CSAT model)  |  |  | $0.6\text{s}^{-1}$    | Fit from experiment |
| tRNA accommodation rate at   | CTC141 (CSAT model) |  |  | $0.817\text{s}^{-1}$  | Fit from experiment |
| tRNA accommodation rate at   | CTC201 (CSAT model) |  |  | $0.754\text{s}^{-1}$  | Fit from experiment |
| tRNA accommodation rate at   | CTC15 (CSAT model)  |  |  | $0.193\text{s}^{-1}$  | Fit from experiment |
| tRNA accommodation rate at   | CTC46 (CSAT model)  |  |  | $0.379\text{s}^{-1}$  | Fit from experiment |
| tRNA accommodation rate at   | CTT68 (CSAT model)  |  |  | $0.213\text{s}^{-1}$  | Fit from experiment |
| tRNA accommodation rate at   | CTT141 (CSAT model) |  |  | $0.69\text{s}^{-1}$   | Fit from experiment |
| tRNA accommodation rate at   | CTT201 (CSAT model) |  |  | $0.582\text{s}^{-1}$  | Fit from experiment |
| tRNA accommodation rate at   | CTT15 (CSAT model)  |  |  | $0.171\text{s}^{-1}$  | Fit from experiment |
| tRNA accommodation rate at   | CTT46 (CSAT model)  |  |  | $0.285\text{s}^{-1}$  | Fit from experiment |
| Continued on next page       |                     |  |  |                       |                     |

| Continued from previous page |                     |  |  |                      |                     |
|------------------------------|---------------------|--|--|----------------------|---------------------|
| Parameter                    |                     |  |  | Value                | Note                |
| tRNA accommodation rate at   | TCG28 (TJ model)    |  |  | $0.263\text{s}^{-1}$ | Fit from experiment |
| tRNA accommodation rate at   | TCG30 (TJ model)    |  |  | $0.266\text{s}^{-1}$ | Fit from experiment |
| tRNA accommodation rate at   | TCG86 (TJ model)    |  |  | $0.281\text{s}^{-1}$ | Fit from experiment |
| tRNA accommodation rate at   | TCG147 (TJ model)   |  |  | $0.273\text{s}^{-1}$ | Fit from experiment |
| tRNA accommodation rate at   | TCG202 (TJ model)   |  |  | $0.252\text{s}^{-1}$ | Fit from experiment |
| tRNA accommodation rate at   | TCG205 (TJ model)   |  |  | $0.29\text{s}^{-1}$  | Fit from experiment |
| tRNA accommodation rate at   | TCG28 (CSAT model)  |  |  | $0.488\text{s}^{-1}$ | Fit from experiment |
| tRNA accommodation rate at   | TCG30 (CSAT model)  |  |  | $0.509\text{s}^{-1}$ | Fit from experiment |
| tRNA accommodation rate at   | TCG86 (CSAT model)  |  |  | $0.725\text{s}^{-1}$ | Fit from experiment |
| tRNA accommodation rate at   | TCG147 (CSAT model) |  |  | $0.767\text{s}^{-1}$ | Fit from experiment |
| tRNA accommodation rate at   | TCG202 (CSAT model) |  |  | $0.601\text{s}^{-1}$ | Fit from experiment |
| tRNA accommodation rate at   | TCG205 (CSAT model) |  |  | $0.935\text{s}^{-1}$ | Fit from experiment |
| tRNA accommodation rate at   | TCG28 (SAT model)   |  |  | $2.19\text{s}^{-1}$  | Fit from experiment |
| tRNA accommodation rate at   | TCG30 (SAT model)   |  |  | $2.13\text{s}^{-1}$  | Fit from experiment |
| tRNA accommodation rate at   | TCG86 (SAT model)   |  |  | $3.82\text{s}^{-1}$  | Fit from experiment |
| tRNA accommodation rate at   | TCG147 (SAT model)  |  |  | $4.59\text{s}^{-1}$  | Fit from experiment |
| tRNA accommodation rate at   | TCG202 (SAT model)  |  |  | $3.22\text{s}^{-1}$  | Fit from experiment |
| tRNA accommodation rate at   | TCG205 (SAT model)  |  |  | $5.15\text{s}^{-1}$  | Fit from experiment |

All other parameters have values shown in Supplementary File 6.
