# Supplementary material for: Kinetic modeling predicts a stimulatory role for ribosome collisions at elongation stall sites in bacteria
Source: eLife journal article supplement (doi:10.7554/elife.23629), 2017-05-12
Supplement: supp [file elife-23629-supp-v1.zip › elife_poa_e23629_Supplementary_File_4.pdf]

Simulation parameters for Fig. 6 (including Figure supplement)

| Parameter                                             | Value                                                           | Note                                                             |
|-------------------------------------------------------|-----------------------------------------------------------------|------------------------------------------------------------------|
| Stall site identity                                   | CTA, CTC                                                        |                                                                  |
| Stall site locations (codon number along <i>yfp</i> ) | 60 (8), 64 (9), 68 (10), 119 (11), 125 (12), 137 (13), 141 (14) | Different combinations of these sites as indicated along X-axis. |
| tRNA accommodation rate at CTC68 (TJ model)           | 0.226s <sup>-1</sup>                                            | Fit from experiment                                              |
| tRNA accommodation rate at CTC119 (TJ model)          | 0.199s <sup>-1</sup>                                            | Fit from experiment                                              |
| tRNA accommodation rate at CTC125 (TJ model)          | 0.205s <sup>-1</sup>                                            | Fit from experiment                                              |
| tRNA accommodation rate at CTC137 (TJ model)          | 0.236s <sup>-1</sup>                                            | Fit from experiment                                              |
| tRNA accommodation rate at CTC141 (TJ model)          | 0.273s <sup>-1</sup>                                            | Fit from experiment                                              |
| tRNA accommodation rate at CTC60 (TJ model)           | 0.228s <sup>-1</sup>                                            | Fit from experiment                                              |
| tRNA accommodation rate at CTC64 (TJ model)           | 0.214s <sup>-1</sup>                                            | Fit from experiment                                              |
| tRNA accommodation rate at CTC68 (CSAT model)         | 0.468s <sup>-1</sup>                                            | Fit from experiment                                              |
| tRNA accommodation rate at CTC119 (CSAT model)        | 0.387s <sup>-1</sup>                                            | Fit from experiment                                              |
| tRNA accommodation rate at CTC125 (CSAT model)        | 0.394s <sup>-1</sup>                                            | Fit from experiment                                              |
| tRNA accommodation rate at CTC137 (CSAT model)        | 0.512s <sup>-1</sup>                                            | Fit from experiment                                              |
| tRNA accommodation rate at CTC141 (CSAT model)        | 0.777s <sup>-1</sup>                                            | Fit from experiment                                              |
| tRNA accommodation rate at CTC60 (CSAT model)         | 0.483s <sup>-1</sup>                                            | Fit from experiment                                              |
| tRNA accommodation rate at CTC64 (CSAT model)         | 0.433s <sup>-1</sup>                                            | Fit from experiment                                              |
| tRNA accommodation rate at CTC68 (SAT model)          | 2.17s <sup>-1</sup>                                             | Fit from experiment                                              |
| tRNA accommodation rate at CTC119 (SAT model)         | 1.71s <sup>-1</sup>                                             | Fit from experiment                                              |
| tRNA accommodation rate at CTC125 (SAT model)         | 1.67s <sup>-1</sup>                                             | Fit from experiment                                              |
| tRNA accommodation rate at CTC137 (SAT model)         | 2.51s <sup>-1</sup>                                             | Fit from experiment                                              |
| tRNA accommodation rate at CTC141 (SAT model)         | 4.26s <sup>-1</sup>                                             | Fit from experiment                                              |
| tRNA accommodation rate at CTC60 (SAT model)          | 2.15s <sup>-1</sup>                                             | Fit from experiment                                              |
| tRNA accommodation rate at CTC64 (SAT model)          | 1.85s <sup>-1</sup>                                             | Fit from experiment                                              |
| Continued on next page                                |                                                                 |                                                                  |

| Continued from previous page                   |  |  |  |                        |                     |
|------------------------------------------------|--|--|--|------------------------|---------------------|
| Parameter                                      |  |  |  | Value                  | Note                |
| tRNA accommodation rate at CTA68 (CSAT model)  |  |  |  | $0.0103\text{s}^{-1}$  | Fit from experiment |
| tRNA accommodation rate at CTA119 (CSAT model) |  |  |  | $0.0146\text{s}^{-1}$  | Fit from experiment |
| tRNA accommodation rate at CTA125 (CSAT model) |  |  |  | $0.0158\text{s}^{-1}$  | Fit from experiment |
| tRNA accommodation rate at CTA137 (CSAT model) |  |  |  | $0.0159\text{s}^{-1}$  | Fit from experiment |
| tRNA accommodation rate at CTA141 (CSAT model) |  |  |  | $0.0183\text{s}^{-1}$  | Fit from experiment |
| tRNA accommodation rate at CTA60 (CSAT model)  |  |  |  | $0.0183\text{s}^{-1}$  | Fit from experiment |
| tRNA accommodation rate at CTA64 (CSAT model)  |  |  |  | $0.012\text{s}^{-1}$   | Fit from experiment |
| tRNA accommodation rate at CTA68 (TJ model)    |  |  |  | $0.00825\text{s}^{-1}$ | Fit from experiment |
| tRNA accommodation rate at CTA119 (TJ model)   |  |  |  | $0.0112\text{s}^{-1}$  | Fit from experiment |
| tRNA accommodation rate at CTA125 (TJ model)   |  |  |  | $0.0113\text{s}^{-1}$  | Fit from experiment |
| tRNA accommodation rate at CTA137 (TJ model)   |  |  |  | $0.0116\text{s}^{-1}$  | Fit from experiment |
| tRNA accommodation rate at CTA141 (TJ model)   |  |  |  | $0.0127\text{s}^{-1}$  | Fit from experiment |
| tRNA accommodation rate at CTA60 (TJ model)    |  |  |  | $0.013\text{s}^{-1}$   | Fit from experiment |
| tRNA accommodation rate at CTA64 (TJ model)    |  |  |  | $0.00923\text{s}^{-1}$ | Fit from experiment |
| tRNA accommodation rate at CTA68 (SAT model)   |  |  |  | $0.0348\text{s}^{-1}$  | Fit from experiment |
| tRNA accommodation rate at CTA119 (SAT model)  |  |  |  | $0.0463\text{s}^{-1}$  | Fit from experiment |
| tRNA accommodation rate at CTA125 (SAT model)  |  |  |  | $0.0529\text{s}^{-1}$  | Fit from experiment |
| tRNA accommodation rate at CTA137 (SAT model)  |  |  |  | $0.0517\text{s}^{-1}$  | Fit from experiment |
| tRNA accommodation rate at CTA141 (SAT model)  |  |  |  | $0.0607\text{s}^{-1}$  | Fit from experiment |
| tRNA accommodation rate at CTA60 (SAT model)   |  |  |  | $0.0672\text{s}^{-1}$  | Fit from experiment |
| tRNA accommodation rate at CTA64 (SAT model)   |  |  |  | $0.0408\text{s}^{-1}$  | Fit from experiment |

All other parameters have values shown in Supplementary File 6.
