# Supplementary material for: Kinetic modeling predicts a stimulatory role for ribosome collisions at elongation stall sites in bacteria
Source: eLife journal article supplement (doi:10.7554/elife.23629), 2017-05-12
Supplement: supp [file elife-23629-supp-v1.zip › elife_poa_e23629_Supplementary_File_5.pdf]

Simulation parameters for Fig. 7

| Parameter                                                                | Value                 | Note       |
|--------------------------------------------------------------------------|-----------------------|------------|
| Stall site identity                                                      | CTA                   | Panel A, B |
| Stall site location (codon number along <i>yfp</i> )                     | 201                   | Panel A, B |
| Threshold tRNA accommodation rate for selective abortive termination     | $22\text{s}^{-1}$     | Panel A, B |
| Threshold tRNA accommodation rate for non-selective abortive termination | $0\text{s}^{-1}$      | Panel A, B |
| tRNA accommodation rate at stall site (TJ model)                         | $0.0914\text{s}^{-1}$ | Panel A, B |
| tRNA accommodation rate at stall site (SAT model)                        | $0.425\text{s}^{-1}$  | Panel A, B |
| tRNA accommodation rate at stall site (CSAT model)                       | $0.13\text{s}^{-1}$   | Panel A, B |

All other parameters have values shown in Supplementary File 6.
