# Supplementary material for: Kinetic modeling predicts a stimulatory role for ribosome collisions at elongation stall sites in bacteria
Source: eLife journal article supplement (doi:10.7554/elife.23629), 2017-05-12
Supplement: supp [file elife-23629-supp-v1.zip › elife_poa_e23629_Supplementary_File_6.pdf]

Parameters common to all simulations

| Parameter                                                            | Value                  | Units                         | Reference                                                       |
|----------------------------------------------------------------------|------------------------|-------------------------------|-----------------------------------------------------------------|
| Cell volume                                                          | $10^{-18}$             | $\text{m}^{-3}$               | <i>Bremer and Dennis (1996); Elf et al. (2003)</i>              |
| Cell doubling time                                                   | 30                     | min                           | This work                                                       |
| Concentration of tRNAs                                               | $4.08 \times 10^5$     | molecules/cell                | <i>Bremer and Dennis (2008)</i>                                 |
| Rate of peptide-bond formation and translocation                     | $\approx 22$ (1/0.045) | $\text{s}^{-1}$               | <i>Bremer and Dennis (2008)</i>                                 |
| tRNA accommodation rate at normal sites (not stall sites)            | 80–1650                | $\text{s}^{-1}$               | Inferred (Methods)                                              |
| Ribosome footprint size on mRNAs                                     | 10                     | codons                        | This work                                                       |
| Number of distinct mRNA species                                      | 2                      | No units                      | This work                                                       |
| Ribosome-tRNA association rate constant                              | $2 \times 10^7$        | $\text{M}^{-1} \text{s}^{-1}$ | <i>Bilgin and Ehrenberg (1994); Pavlov and Ehrenberg (1996)</i> |
| tRNA aminoacylation rate constant                                    | $2 \times 10^{10}$     | $\text{M}^{-1} \text{s}^{-1}$ | This work                                                       |
| Threshold tRNA accommodation rate for selective abortive termination | 22                     | $\text{s}^{-1}$               | This work                                                       |
| Abortive termination rate constant (SAT and CSAT models)             | 1                      | $\text{s}^{-1}$               | This work                                                       |
| Abortive termination rate constant (TJ model)                        | 0                      | $\text{s}^{-1}$               | This work                                                       |
| Translation initiation rate                                          | 0.3                    | $\text{s}^{-1}$               | This work                                                       |

## References

- Bilgin N**, Ehrenberg M. Mutations in 23 S Ribosomal RNA Perturb Transfer RNA Selection and Can Lead to Streptomycin Dependence. *Journal of Molecular Biology*. 1994 jan; 235(3):813–824.
- Bremer H**, Dennis P. Modulation of Chemical Composition and Other Parameters of the Cell at Different Exponential Growth Rates. *EcoSal Plus*. 2008; doi: [10.1128/ecosal.5.2.3](https://doi.org/10.1128/ecosal.5.2.3).
- Bremer H**, Dennis P. Modulation of Chemical Composition and Other Parameters of the Cell by Growth Rate. In: *Escherichia Coli and Salmonella* Washington, DC: ASM Press; 1996.p. 1553–1569.
- Elf J**, Nilsson D, Tenson T, Ehrenberg M. Selective Charging of tRNA Isoacceptors Explains Patterns of Codon Usage. *Science*. 2003 jun; 300(5626):1718–1722.
- Pavlov MY**, Ehrenberg M. Rate of Translation of Natural mRNAs in an Optimized in Vitro System. *Archives of Biochemistry and Biophysics*. 1996 apr; 328(1):9–16.
