# Supplementary material for: Kinetic modeling predicts a stimulatory role for ribosome collisions at elongation stall sites in bacteria
Source: eLife journal article supplement (doi:10.7554/elife.23629), 2017-05-12
Supplement: supp [file elife-23629-supp-v1.zip › elife_poa_e23629_Supplementary_File_7.pdf]

## List of strains and plasmids

| Strain Number          | Genotype                                       | Note                                                                                                                  |
|------------------------|------------------------------------------------|-----------------------------------------------------------------------------------------------------------------------|
| ecMF1                  | MG1655- <i>attBλ::lacI tetR speR-leuB::FRT</i> | ( <i>Subramaniam et al., 2013</i> )                                                                                   |
| ecMF82                 | ecMF1 pASEC1 (pZS*11- <i>yfp0</i> )            | No stall control during Leu starvation, parent <i>yfp0</i> sequence, Addgene #53241, <i>Subramaniam et al. (2013)</i> |
| ecMF112                | ecMF1 pASEC1-CTA4to10                          | Control with 7 Leu stall sites                                                                                        |
| ecMF323                | ecMF1 pZS*11-3xFLAG- <i>yfp0</i>               | Fig. 1                                                                                                                |
| ecMF324                | ecMF1 pZS*11-3xFLAG- <i>yfp0</i> -CTA13        | Fig. 1                                                                                                                |
| ecMF325                | ecMF1 pZS*11-3xFLAG- <i>yfp0</i> -CTA14        | Fig. 1                                                                                                                |
| ecMF326                | ecMF1 pZS*11-3xFLAG- <i>yfp0</i> -CTA13-14     | Fig. 1                                                                                                                |
| ecMF327                | ecMF1 pZS*11-3xFLAG- <i>yfp0</i> -CTA13-14     | Fig. 1                                                                                                                |
| ecMF74                 | ecMF1 pASEC1-CTA18                             | Fig. 4, 5                                                                                                             |
| ecMF103                | ecMF1 pASEC1-TTG                               | Fig. 4, Fig. 4–Figure supplement 1                                                                                    |
| ecMF104                | ecMF1 pASEC1-ATC                               | Fig. 4, Fig. 4–Figure supplement 1                                                                                    |
| ecMF107                | ecMF1 pASEC1-RBS2                              | Fig. 4, Fig. 4–Figure supplement 1                                                                                    |
| ecMF109                | ecMF1 pASEC1-RBS4                              | Fig. 4, Fig. 4–Figure supplement 1                                                                                    |
| ecMF152                | ecMF1 pASEC1-TTG-CTA18                         | Fig. 4                                                                                                                |
| ecMF155                | ecMF1 pASEC1-ATC-CTA18                         | Fig. 4                                                                                                                |
| ecMF159                | ecMF1 pASEC1-RBS2-CTA18                        | Fig. 4                                                                                                                |
| ecMF163                | ecMF1 pASEC1-RBS4-CTA18                        | Fig. 4                                                                                                                |
| ecMF62                 | ecMF1 pASEC1-CTA2                              | Fig. 5                                                                                                                |
| ecMF66                 | ecMF1 pASEC1-CTA6                              | Fig. 5, Fig. 4–Figure supplement 1                                                                                    |
| ecMF68                 | ecMF1 pASEC1-CTA10                             | Fig. 5, Fig. 6, Fig. 4–Figure supplement 1                                                                            |
| ecMF72                 | ecMF1 pASEC1-CTA14                             | Fig. 5, Fig. 6, Fig. 4–Figure supplement 1                                                                            |
| ecMF89                 | ecMF1 pASEC1-CTA2-6                            | Fig. 5                                                                                                                |
| ecMF91                 | ecMF1 pASEC1-CTA2-10                           | Fig. 5                                                                                                                |
| ecMF83                 | ecMF1 pASEC1-CTA2-14                           | Fig. 5                                                                                                                |
| ecMF84                 | ecMF1 pASEC1-CTA2-18                           | Fig. 5                                                                                                                |
| ecMF92                 | ecMF1 pASEC1-CTA6-10                           | Fig. 5                                                                                                                |
| ecMF85                 | ecMF1 pASEC1-CTA6-14                           | Fig. 5                                                                                                                |
| ecMF86                 | ecMF1 pASEC1-CTA6-18                           | Fig. 5                                                                                                                |
| ecMF87                 | ecMF1 pASEC1-CTA10-14                          | Fig. 5                                                                                                                |
| ecMF88                 | ecMF1 pASEC1-CTA10-18                          | Fig. 5                                                                                                                |
| ecMF90                 | ecMF1 pASEC1-CTA14-18                          | Fig. 5                                                                                                                |
| ecMF438                | ecMF1 pASEC1-CTA6-10-14                        | Fig. 5                                                                                                                |
| ecMF439                | ecMF1 pASEC1-CTA6-10-18                        | Fig. 5                                                                                                                |
| ecMF440                | ecMF1 pASEC1-CTA6-10-14-18                     | Fig. 5                                                                                                                |
| ecMF80                 | ecMF1 pASEC1-CTA8                              | Fig. 6                                                                                                                |
| ecMF67                 | ecMF1 pASEC1-CTA9                              | Fig. 6                                                                                                                |
| ecMF69                 | ecMF1 pASEC1-CTA11                             | Fig. 6                                                                                                                |
| ecMF70                 | ecMF1 pASEC1-CTA12                             | Fig. 6                                                                                                                |
| ecMF71                 | ecMF1 pASEC1-CTA13                             | Fig. 6                                                                                                                |
| ecMF249                | ecMF1 pASEC1-CTA8-9                            | Fig. 6                                                                                                                |
| ecMF250                | ecMF1 pASEC1-CTA8-10                           | Fig. 6                                                                                                                |
| Continued on next page |                                                |                                                                                                                       |

| Continued from previous page |                                                                                           |                                                                                                        |
|------------------------------|-------------------------------------------------------------------------------------------|--------------------------------------------------------------------------------------------------------|
| Strain Number                | Genotype                                                                                  | Note                                                                                                   |
| ecMF251                      | ecMF1 pASEC1-CTA8-11                                                                      | Fig. 6                                                                                                 |
| ecMF252                      | ecMF1 pASEC1-CTA8-12                                                                      | Fig. 6                                                                                                 |
| ecMF253                      | ecMF1 pASEC1-CTA8-13                                                                      | Fig. 6                                                                                                 |
| ecMF254                      | ecMF1 pASEC1-CTA8-14                                                                      | Fig. 6                                                                                                 |
| ecMF260                      | ecMF1 pASEC1-CTA11-12                                                                     | Fig. 6                                                                                                 |
| ecMF261                      | ecMF1 pASEC1-CTA13-14                                                                     | Fig. 6                                                                                                 |
| ecMF99                       | ecMF1 pASEC1-CTT6                                                                         | Fig. 4–Figure supplement 1A, Fig. 5–Figure supplement 1B                                               |
| ecMF135                      | ecMF1 pASEC1-TTG-CTT6                                                                     | Fig. 4–Figure supplement 1A                                                                            |
| ecMF139                      | ecMF1 pASEC1-ATC-CTT6                                                                     | Fig. 4–Figure supplement 1A                                                                            |
| ecMF143                      | ecMF1 pASEC1-RBS2-CTT6                                                                    | Fig. 4–Figure supplement 1A                                                                            |
| ecMF147                      | ecMF1 pASEC1-RBS4-CTT6                                                                    | Fig. 4–Figure supplement 1A                                                                            |
| ecMF100                      | ecMF1 pASEC1-CTT10                                                                        | Fig. 4–Figure supplement 1B, Fig. 5–Figure supplement 1B                                               |
| ecMF136                      | ecMF1 pASEC1-TTG-CTT10                                                                    | Fig. 4–Figure supplement 1B                                                                            |
| ecMF140                      | ecMF1 pASEC1-ATC-CTT10                                                                    | Fig. 4–Figure supplement 1B                                                                            |
| ecMF144                      | ecMF1 pASEC1-RBS2-CTT10                                                                   | Fig. 4–Figure supplement 1B                                                                            |
| ecMF148                      | ecMF1 pASEC1-RBS4-CTT10                                                                   | Fig. 4–Figure supplement 1B                                                                            |
| ecMF95                       | ecMF1 pASEC1-CTC10                                                                        | Fig. 4–Figure supplement 1C, Fig. 5–Figure supplement 1A, Fig. 6–Figure supplement 1                   |
| ecMF133                      | ecMF1 pASEC1-TTG-CTC10                                                                    | Fig. 4–Figure supplement 1C                                                                            |
| ecMF137                      | ecMF1 pASEC1-ATC-CTC10                                                                    | Fig. 4–Figure supplement 1C                                                                            |
| ecMF141                      | ecMF1 pASEC1-RBS2-CTC10                                                                   | Fig. 4–Figure supplement 1C                                                                            |
| ecMF145                      | ecMF1 pASEC1-RBS4-CTC10                                                                   | Fig. 4–Figure supplement 1C                                                                            |
| ecMF96                       | ecMF1 pASEC1-CTC14                                                                        | Fig. 4–Figure supplement 1D, Fig. 5–Figure supplement 1A                                               |
| ecMF134                      | ecMF1 pASEC1-TTG-CTC14                                                                    | Fig. 4–Figure supplement 1D                                                                            |
| ecMF138                      | ecMF1 pASEC1-ATC-CTC14                                                                    | Fig. 4–Figure supplement 1D                                                                            |
| ecMF142                      | ecMF1 pASEC1-RBS2-CTC14                                                                   | Fig. 4–Figure supplement 1D                                                                            |
| ecMF146                      | ecMF1 pASEC1-RBS4-CTC14                                                                   | Fig. 4–Figure supplement 1D                                                                            |
| ecMF149                      | ecMF1 pASEC1-TTG-CTA6                                                                     | Fig. 4–Figure supplement 1E                                                                            |
| ecMF156                      | ecMF1 pASEC1-RBS2-CTA6                                                                    | Fig. 4–Figure supplement 1E                                                                            |
| ecMF160                      | ecMF1 pASEC1-RBS4-CTA6                                                                    | Fig. 4–Figure supplement 1E                                                                            |
| ecMF150                      | ecMF1 pASEC1-TTG-CTA10                                                                    | Fig. 4–Figure supplement 1F                                                                            |
| ecMF153                      | ecMF1 pASEC1-ATC-CTA10                                                                    | Fig. 4–Figure supplement 1F                                                                            |
| ecMF157                      | ecMF1 pASEC1-RBS2-CTA10                                                                   | Fig. 4–Figure supplement 1F                                                                            |
| ecMF161                      | ecMF1 pASEC1-RBS4-CTA10                                                                   | Fig. 4–Figure supplement 1F                                                                            |
| ecMF151                      | ecMF1 pASEC1-TTG-CTA14                                                                    | Fig. 4–Figure supplement 1G                                                                            |
| ecMF154                      | ecMF1 pASEC1-ATC-CTA14                                                                    | Fig. 4–Figure supplement 1G                                                                            |
| ecMF158                      | ecMF1 pASEC1-RBS2-CTA14                                                                   | Fig. 4–Figure supplement 1G                                                                            |
| ecMF162                      | ecMF1 pASEC1-RBS4-CTA14                                                                   | Fig. 4–Figure supplement 1G                                                                            |
| ecMF403                      | MG1655- <i>attB</i> $\lambda$ :: <i>lacI</i> <i>tetR</i> <i>speR-serA::Plac-serA-kanR</i> | <i>lacI</i> -repressed <i>serA</i> gene                                                                |
| ecMF411                      | ecMF403 pASEC2 (pZS*11- <i>yfp13</i> )                                                    | No stall control during Ser starvation, parent <i>yfp13</i> sequence, <i>Subramaniam et al. (2013)</i> |

Continued on next page

| Continued from previous page |                          |                                                          |
|------------------------------|--------------------------|----------------------------------------------------------|
| Strain Number                | Genotype                 | Note                                                     |
| ecMF412                      | ecMF403 pASEC2-TCG2to8   | Control with 7 Ser stall sites                           |
| ecMF407                      | ecMF403 pASEC2-TCG5      | Fig. 4–Figure supplement 1H, Fig. 5–Figure supplement 1C |
| ecMF424                      | ecMF403 pASEC2-TTG-TCG5  | Fig. 4–Figure supplement 1H                              |
| ecMF428                      | ecMF403 pASEC2-ATC-TCG5  | Fig. 4–Figure supplement 1H                              |
| ecMF432                      | ecMF403 pASEC2-RBS2-TCG5 | Fig. 4–Figure supplement 1H                              |
| ecMF436                      | ecMF403 pASEC2-RBS4-TCG5 | Fig. 4–Figure supplement 1H                              |
| ecMF93                       | ecMF1 pASEC1-CTC2        | Fig. 5–Figure supplement 1A                              |
| ecMF94                       | ecMF1 pASEC1-CTC6        | Fig. 5–Figure supplement 1A                              |
| ecMF97                       | ecMF1 pASEC1-CTC18       | Fig. 5–Figure supplement 1A                              |
| ecMF119                      | ecMF1 pASEC1-CTC2-6      | Fig. 5–Figure supplement 1A                              |
| ecMF121                      | ecMF1 pASEC1-CTC2-10     | Fig. 5–Figure supplement 1A                              |
| ecMF113                      | ecMF1 pASEC1-CTC2-14     | Fig. 5–Figure supplement 1A                              |
| ecMF114                      | ecMF1 pASEC1-CTC2-18     | Fig. 5–Figure supplement 1A                              |
| ecMF122                      | ecMF1 pASEC1-CTC6-10     | Fig. 5–Figure supplement 1A                              |
| ecMF115                      | ecMF1 pASEC1-CTC6-14     | Fig. 5–Figure supplement 1A                              |
| ecMF116                      | ecMF1 pASEC1-CTC6-18     | Fig. 5–Figure supplement 1A                              |
| ecMF117                      | ecMF1 pASEC1-CTC10-14    | Fig. 5–Figure supplement 1A                              |
| ecMF118                      | ecMF1 pASEC1-CTC10-18    | Fig. 5–Figure supplement 1A                              |
| ecMF120                      | ecMF1 pASEC1-CTC14-18    | Fig. 5–Figure supplement 1A                              |
| ecMF98                       | ecMF1 pASEC1-CTT2        | Fig. 5–Figure supplement 1B                              |
| ecMF101                      | ecMF1 pASEC1-CTT14       | Fig. 5–Figure supplement 1B                              |
| ecMF102                      | ecMF1 pASEC1-CTT18       | Fig. 5–Figure supplement 1B                              |
| ecMF129                      | ecMF1 pASEC1-CTT2-6      | Fig. 5–Figure supplement 1B                              |
| ecMF131                      | ecMF1 pASEC1-CTT2-10     | Fig. 5–Figure supplement 1B                              |
| ecMF123                      | ecMF1 pASEC1-CTT2-14     | Fig. 5–Figure supplement 1B                              |
| ecMF124                      | ecMF1 pASEC1-CTT2-18     | Fig. 5–Figure supplement 1B                              |
| ecMF132                      | ecMF1 pASEC1-CTT6-10     | Fig. 5–Figure supplement 1B                              |
| ecMF125                      | ecMF1 pASEC1-CTT6-14     | Fig. 5–Figure supplement 1B                              |
| ecMF126                      | ecMF1 pASEC1-CTT6-18     | Fig. 5–Figure supplement 1B                              |
| ecMF127                      | ecMF1 pASEC1-CTT10-14    | Fig. 5–Figure supplement 1B                              |
| ecMF128                      | ecMF1 pASEC1-CTT10-18    | Fig. 5–Figure supplement 1B                              |
| ecMF130                      | ecMF1 pASEC1-CTT14-18    | Fig. 5–Figure supplement 1B                              |
| ecMF404                      | ecMF403 pASEC2-TCG2      | Fig. 5–Figure supplement 1C                              |
| ecMF405                      | ecMF403 pASEC2-TCG3      | Fig. 5–Figure supplement 1C                              |
| ecMF406                      | ecMF403 pASEC2-TCG4      | Fig. 5–Figure supplement 1C                              |
| ecMF408                      | ecMF403 pASEC2-TCG6      | Fig. 5–Figure supplement 1C                              |
| ecMF409                      | ecMF403 pASEC2-TCG7      | Fig. 5–Figure supplement 1C                              |
| ecMF413                      | ecMF403 pASEC2-TCG2-5    | Fig. 5–Figure supplement 1C                              |
| ecMF414                      | ecMF403 pASEC2-TCG2-6    | Fig. 5–Figure supplement 1C                              |
| ecMF415                      | ecMF403 pASEC2-TCG2-7    | Fig. 5–Figure supplement 1C                              |
| ecMF416                      | ecMF403 pASEC2-TCG3-5    | Fig. 5–Figure supplement 1C                              |
| ecMF417                      | ecMF403 pASEC2-TCG3-6    | Fig. 5–Figure supplement 1C                              |
| ecMF418                      | ecMF403 pASEC2-TCG3-7    | Fig. 5–Figure supplement 1C                              |
| ecMF419                      | ecMF403 pASEC2-TCG4-5    | Fig. 5–Figure supplement 1C                              |
| ecMF420                      | ecMF403 pASEC2-TCG4-6    | Fig. 5–Figure supplement 1C                              |
| ecMF421                      | ecMF403 pASEC2-TCG4-7    | Fig. 5–Figure supplement 1C                              |

Continued on next page

Continued from previous page

| Strain Number | Genotype                                                    | Note                       |
|---------------|-------------------------------------------------------------|----------------------------|
| ecMF164       | ecMF1 pASEC1-CTC8                                           | Fig. 6–Figure supplement 1 |
| ecMF165       | ecMF1 pASEC1-CTC9                                           | Fig. 6–Figure supplement 1 |
| ecMF226       | ecMF1 pASEC1-CTC11                                          | Fig. 6–Figure supplement 1 |
| ecMF227       | ecMF1 pASEC1-CTC12                                          | Fig. 6–Figure supplement 1 |
| ecMF166       | ecMF1 pASEC1-CTC8-9                                         | Fig. 6–Figure supplement 1 |
| ecMF167       | ecMF1 pASEC1-CTC8-10                                        | Fig. 6–Figure supplement 1 |
| ecMF228       | ecMF1 pASEC1-CTC8-11                                        | Fig. 6–Figure supplement 1 |
| ecMF229       | ecMF1 pASEC1-CTC8-12                                        | Fig. 6–Figure supplement 1 |
| ecMF168       | ecMF1 pASEC1-CTC9-10                                        | Fig. 6–Figure supplement 1 |
| ecMF234       | ecMF1 pASEC1-CTC9-11                                        | Fig. 6–Figure supplement 1 |
| ecMF235       | ecMF1 pASEC1-CTC9-12                                        | Fig. 6–Figure supplement 1 |
| ecMF230       | ecMF1 pASEC1-CTC11-12                                       | Fig. 6–Figure supplement 1 |
| ecMF395       | MG1655- <i>leuB</i> :: <i>FRT-attBλ::yfp0-ampR</i>          | Author-response Fig. 1, 2  |
| ecMF396       | MG1655- <i>leuB</i> :: <i>FRT-attBλ::yfp0-CTA4to10-ampR</i> | Author-response Fig. 1, 2  |
| ecMF397       | MG1655- <i>leuB</i> :: <i>FRT-attBλ::yfp0-CTA6-ampR</i>     | Author-response Fig. 1, 2  |
| ecMF398       | MG1655- <i>leuB</i> :: <i>FRT-attBλ::yfp0-CTA10-ampR</i>    | Author-response Fig. 1, 2  |
| ecMF399       | MG1655- <i>leuB</i> :: <i>FRT-attBλ::yfp0-CTA14-ampR</i>    | Author-response Fig. 1, 2  |
| ecMF400       | MG1655- <i>leuB</i> :: <i>FRT-attBλ::yfp0-CTA6-10-ampR</i>  | Author-response Fig. 1, 2  |
| ecMF401       | MG1655- <i>leuB</i> :: <i>FRT-attBλ::yfp0-CTA6-14-ampR</i>  | Author-response Fig. 1, 2  |
| ecMF402       | MG1655- <i>leuB</i> :: <i>FRT-attBλ::yfp0-CTA10-14-ampR</i> | Author-response Fig. 1, 2  |

## References

**Subramaniam AR**, Pan T, Cluzel P. Environmental Perturbations Lift the Degeneracy of the Genetic Code to Regulate Protein Levels in Bacteria. *PNAS*. 2013; 110(6):2419–2424.
