# Supplementary figures and images for: Kinetic modeling predicts a stimulatory role for ribosome collisions at elongation stall sites in bacteria
Source: eLife journal article supplement (doi:10.7554/elife.23629), 2017-05-12

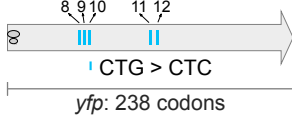

- ▲ Measured
- TJ 16%
- ◆ CSAT 8%
- SAT 13%

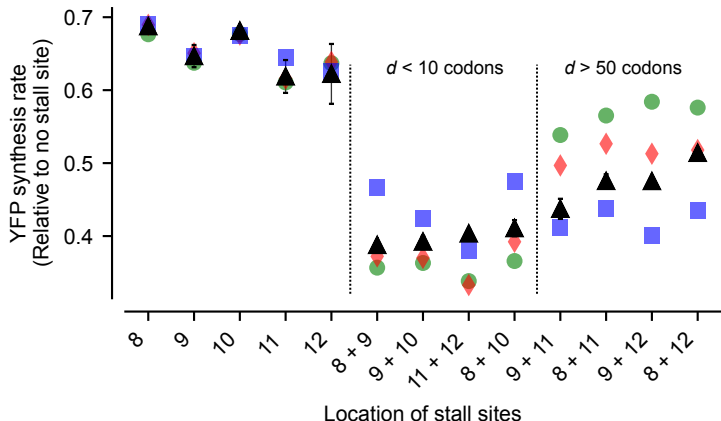

Supplement: supp [file elife-23629-supp-v1.zip]

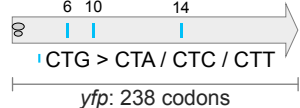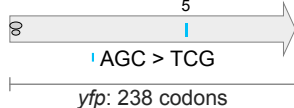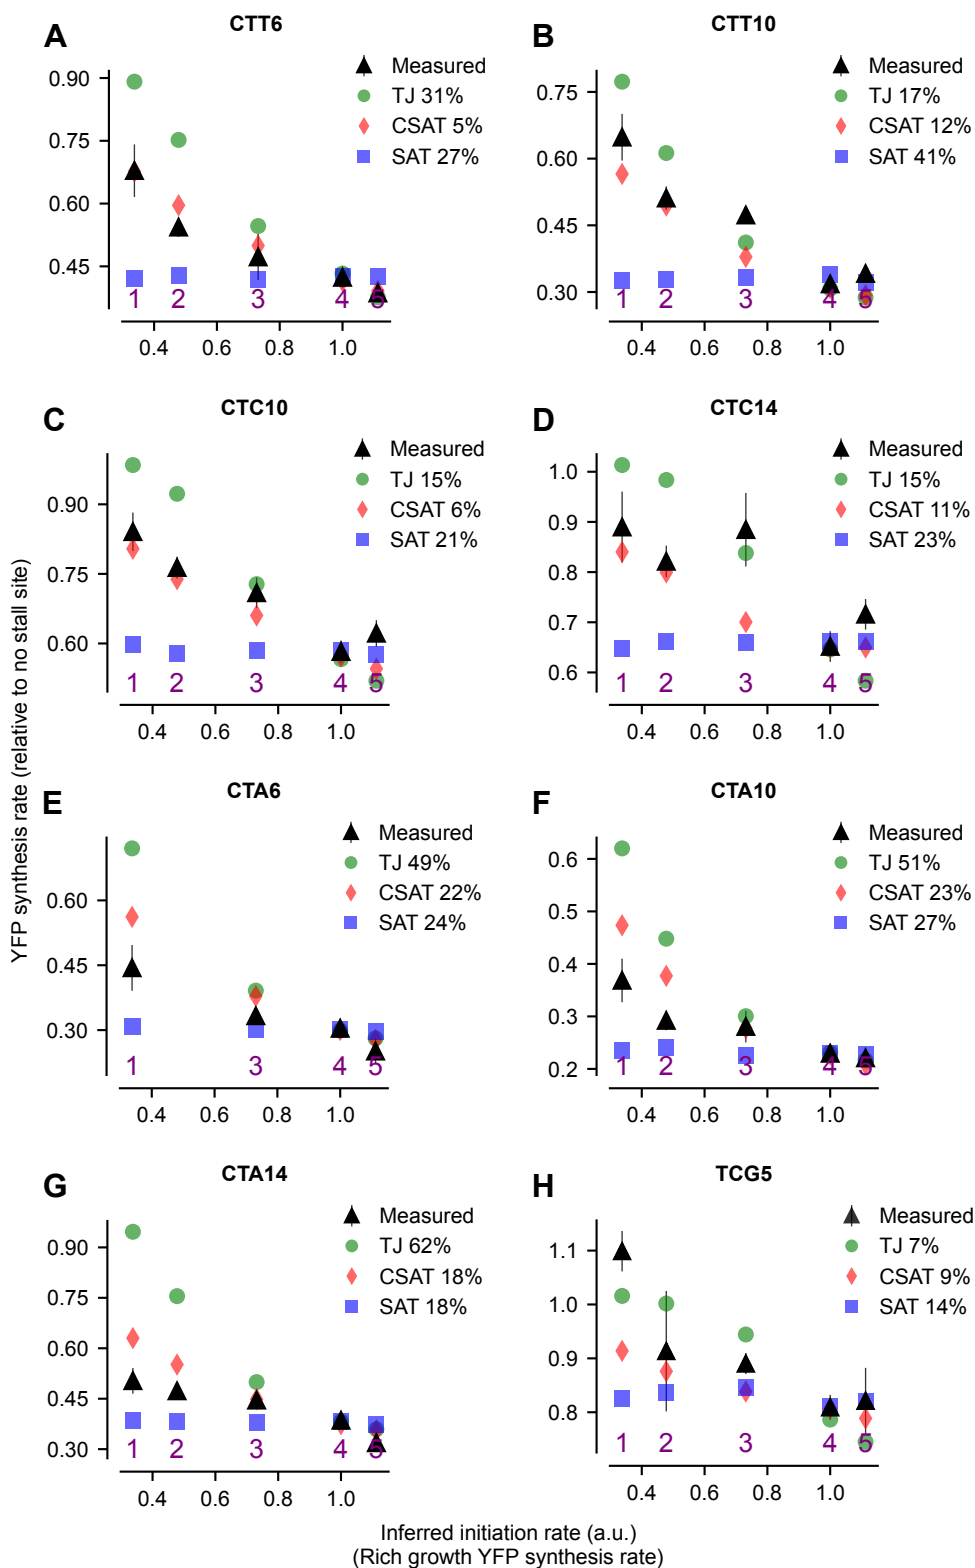

Supplement: supp [file elife-23629-supp-v1.zip]

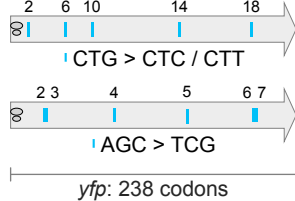

**A**

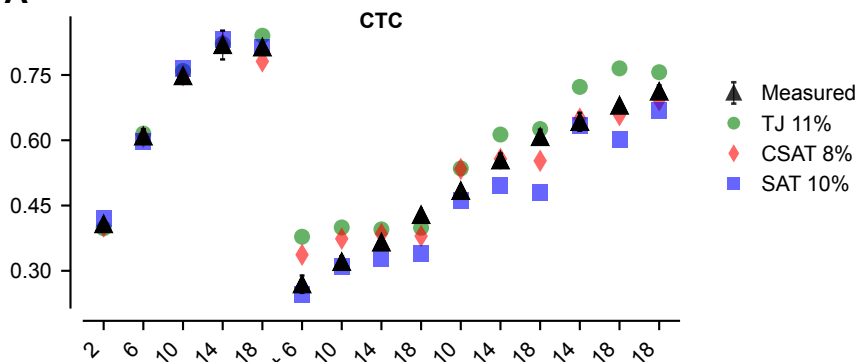

**B**

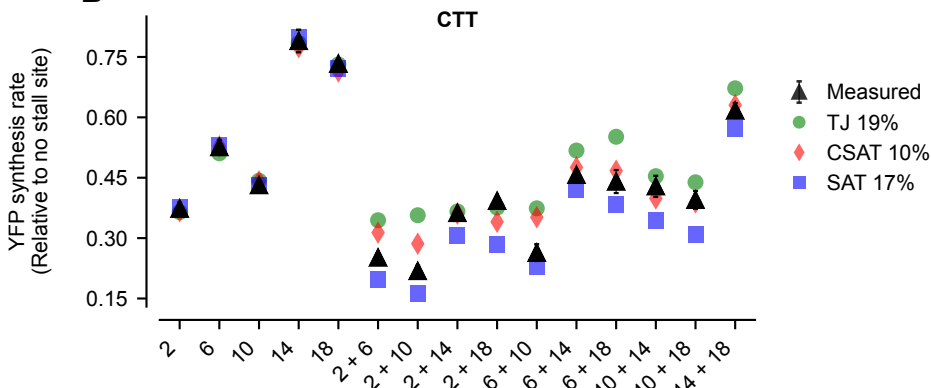

**C**

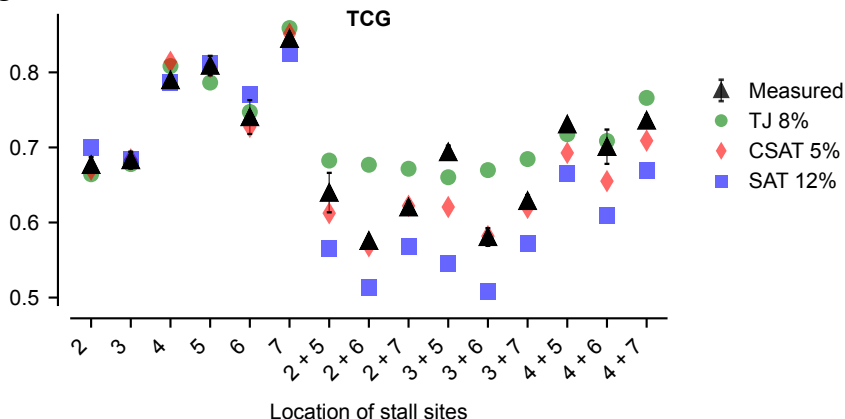

Supplement: supp [file elife-23629-supp-v1.zip › elife_poa_e23629_Figure_5_Figure_Supplement_1.pdf]
